# Supplementary material for: Carbon aerogel as a solid-phase microextraction fiber coating for the extraction and detection of trace tetracycline residues in food by coupling with high-performance liquid chromatography
Source: Royal Society of Chemistry journal article supplement (doi:10.1039/d0ay02140g), 2020-12-14
Supplement: d0ay02140g1.pdf [file d0ay02140g1.pdf]

**Carbon aerogel as solid-phase microextraction fiber coating for extraction and  
detection of trace tetracyclines residues in foods by coupling with high-performance  
liquid chromatography**

Zong-Mu Dong<sup>a,\*</sup>, Lu Cheng<sup>a</sup>, Tong Sun<sup>a</sup>, Guang-Chao Zhao<sup>a</sup>, Xianwen Kan<sup>b</sup>

<sup>a</sup>School of Ecology and Environment, Anhui Normal University, Wuhu 241000, China

<sup>b</sup>College of Chemistry and Materials Science, Anhui Normal University, Wuhu 241000,  
China

\*Corresponding author: Zong-Mu Dong

Tel.: +86 553 5910724

Fax: +86 553 5910720

\*Corresponding author. E-mail: [dzongmu@mail.ahnu.edu.cn](mailto:dzongmu@mail.ahnu.edu.cn).

## Figures

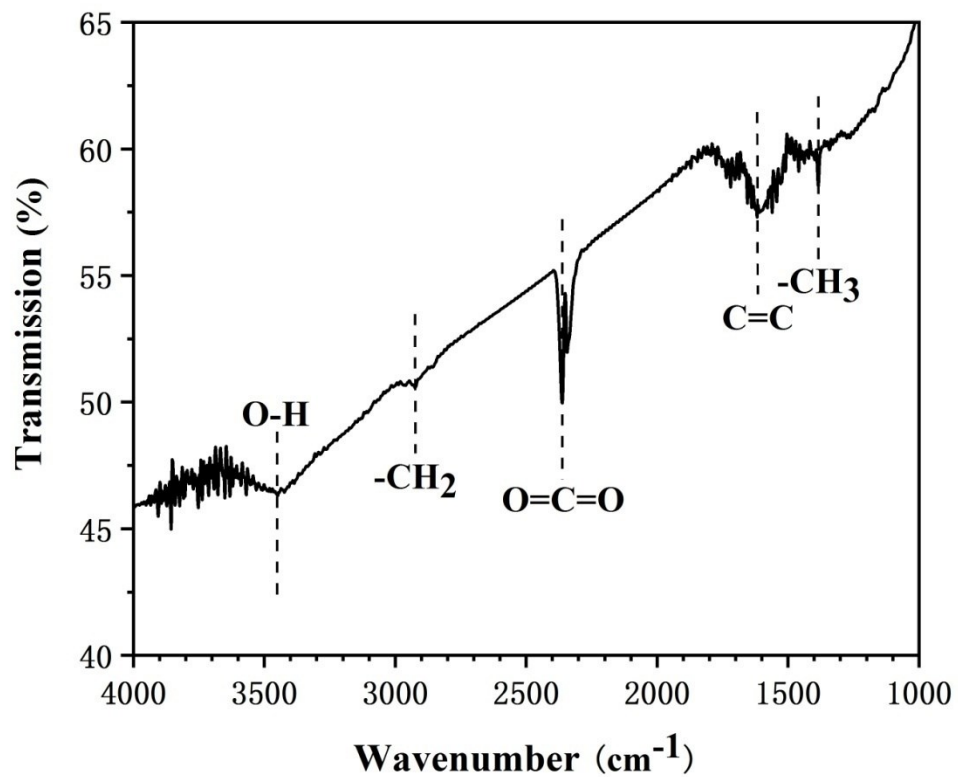

Fig. S1. FTIR spectra of CA.

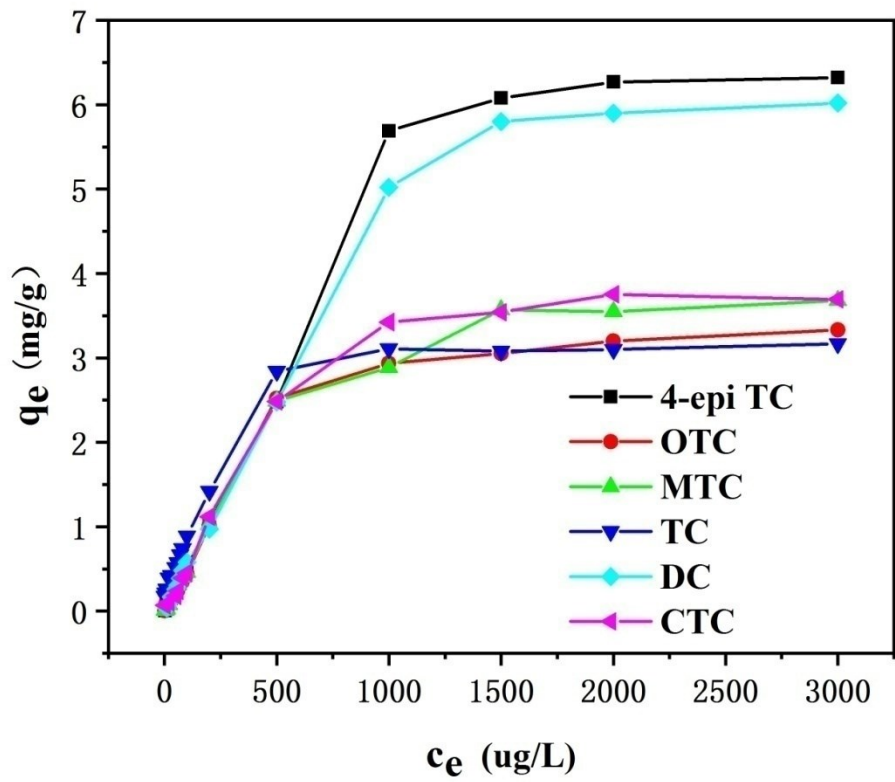

Fig. S2. The equilibrium adsorption fitting curves of CA fiber for TCs.

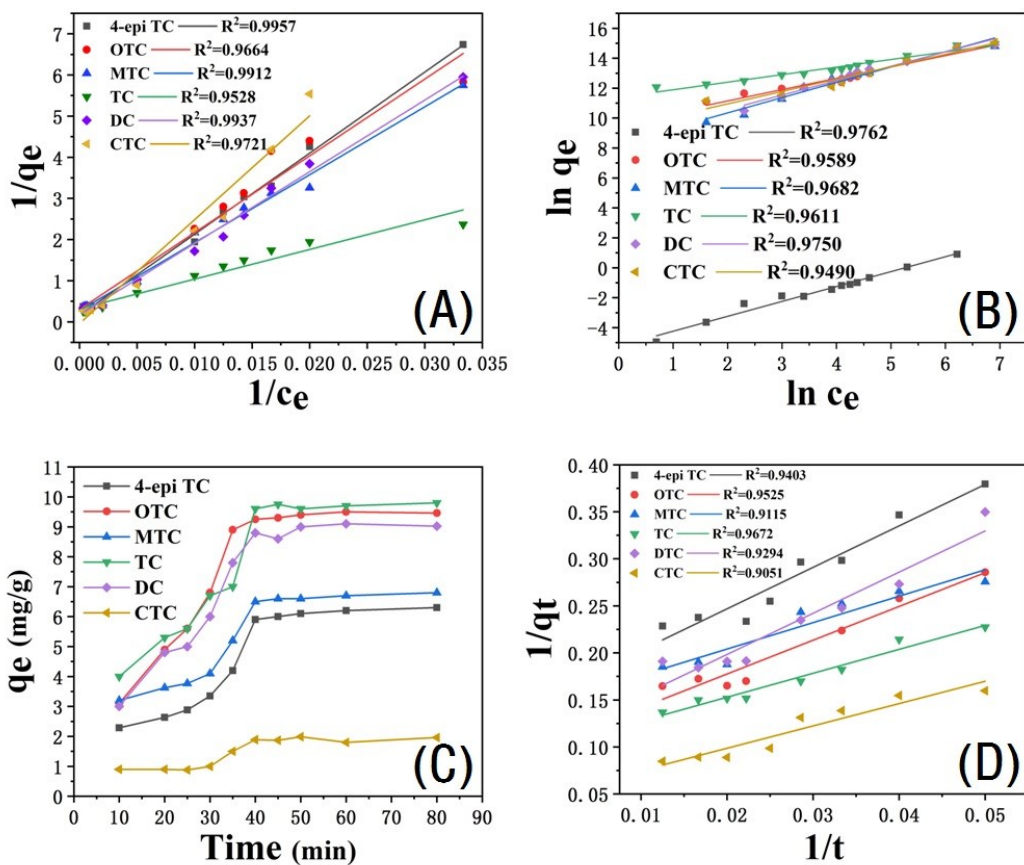

**Fig. S3.** The adsorption isotherms of Langmuir (A), Freundlich (B), and adsorption kinetics (C), the Pseudo-second order kinetics model for adsorption (D) of TCs on CA.

**Tables:**

**Table S1:** Factors, Coded Levels, and BBD Matrix.

| Factors                                    |  | Coded levels |                |              |
|--------------------------------------------|--|--------------|----------------|--------------|
|                                            |  | Low<br>(-1)  | Central<br>(0) | High<br>(+1) |
| X <sub>1</sub> :extraction temperature(°C) |  | 30           | 45             | 60           |
| X <sub>2</sub> :extraction time(min)       |  | 40           | 60             | 80           |
| X <sub>3</sub> :salt concentration(wt%)    |  | 0            | 7.5            | 15           |
| X <sub>4</sub> :desorption time(min)       |  | 2            | 13.5           | 25           |

  

| Standard order | Runorder | X <sub>1</sub> | X <sub>2</sub> | X <sub>3</sub> | X <sub>4</sub> |
|----------------|----------|----------------|----------------|----------------|----------------|
| 25             | 1        | 0              | 0              | 0              | 0              |
| 22             | 2        | 0              | 1              | 0              | -1             |
| 12             | 3        | 1              | 0              | 0              | 1              |
| 19             | 4        | -1             | 0              | 1              | 0              |
| 6              | 5        | 0              | 0              | 1              | -1             |
| 23             | 6        | 0              | -1             | 0              | 1              |
| 29             | 7        | 0              | 0              | 0              | 0              |
| 21             | 8        | 0              | -1             | 0              | -1             |
| 26             | 9        | 0              | 0              | 0              | 0              |
| 28             | 10       | 0              | 0              | 0              | 0              |
| 8              | 11       | 0              | 0              | 1              | 1              |
| 9              | 12       | -1             | 0              | 0              | -1             |
| 27             | 13       | 0              | 0              | 0              | 0              |
| 1              | 14       | -1             | -1             | 0              | 0              |
| 11             | 15       | -1             | 0              | 0              | 1              |
| 14             | 16       | 0              | 1              | -1             | 0              |
| 15             | 17       | 0              | -1             | 1              | 0              |
| 3              | 18       | -1             | 1              | 0              | 0              |
| 17             | 19       | -1             | 0              | -1             | 0              |
| 7              | 20       | 0              | 0              | -1             | 1              |
| 2              | 21       | 1              | -1             | 0              | 0              |
| 16             | 22       | 0              | 1              | 1              | 0              |
| 4              | 23       | 1              | 1              | 0              | 0              |
| 5              | 24       | 0              | 0              | -1             | -1             |
| 18             | 25       | 1              | 0              | -1             | 0              |
| 10             | 26       | 1              | 0              | 0              | -1             |
| 20             | 27       | 1              | 0              | 1              | 0              |
| 24             | 28       | 0              | 1              | 0              | 1              |
| 13             | 29       | 0              | -1             | -1             | 0              |

**Table S2:** Experimental BBD Matrix.

| Standardorder | Run order | X <sub>1</sub> (°C) | X <sub>2</sub> (min) | X <sub>3</sub> (wt%) | X <sub>4</sub> (min) |
|---------------|-----------|---------------------|----------------------|----------------------|----------------------|
| 21            | 1         | 45                  | 40                   | 7.5                  | 2                    |
| 16            | 2         | 45                  | 80                   | 15                   | 13.5                 |
| 26            | 3         | 45                  | 60                   | 7.5                  | 13.5                 |
| 5             | 4         | 45                  | 60                   | 0                    | 2                    |
| 23            | 5         | 45                  | 40                   | 7.5                  | 25                   |
| 11            | 6         | 30                  | 60                   | 7.5                  | 25                   |
| 27            | 7         | 45                  | 60                   | 7.5                  | 13.5                 |
| 14            | 8         | 45                  | 80                   | 0                    | 13.5                 |
| 3             | 9         | 30                  | 80                   | 7.5                  | 13.5                 |
| 10            | 10        | 60                  | 60                   | 7.5                  | 2                    |
| 2             | 11        | 60                  | 40                   | 7.5                  | 13.5                 |
| 25            | 12        | 45                  | 60                   | 7.5                  | 13.5                 |
| 18            | 13        | 60                  | 60                   | 0                    | 13.5                 |
| 15            | 14        | 45                  | 40                   | 15                   | 13.5                 |
| 1             | 15        | 30                  | 40                   | 7.5                  | 13.5                 |
| 19            | 16        | 30                  | 60                   | 15                   | 13.5                 |
| 9             | 17        | 30                  | 60                   | 7.5                  | 2                    |
| 24            | 18        | 45                  | 80                   | 7.5                  | 25                   |
| 6             | 19        | 45                  | 60                   | 15                   | 2                    |
| 13            | 20        | 45                  | 40                   | 0                    | 13.5                 |
| 22            | 21        | 45                  | 80                   | 7.5                  | 2                    |
| 28            | 22        | 45                  | 60                   | 7.5                  | 13.5                 |
| 20            | 23        | 60                  | 60                   | 15                   | 13.5                 |
| 17            | 24        | 30                  | 60                   | 0                    | 13.5                 |
| 29            | 25        | 45                  | 60                   | 7.5                  | 13.5                 |
| 7             | 26        | 45                  | 60                   | 0                    | 25                   |
| 12            | 27        | 60                  | 60                   | 7.5                  | 25                   |
| 8             | 28        | 45                  | 60                   | 15                   | 25                   |
| 4             | 29        | 60                  | 80                   | 7.5                  | 13.5                 |

**Table S3:** Parameters of Langmuir, Freundlich adsorption isotherms, Pseudo-firstorder

and Pseudo-second order model for analytes on CA-coated fiber.

| Analyte <sup>s</sup> | Langmuir                       |                                 |                | Freundlich                     |          |                | Pseudo-first order         |                                 |                | Pseudo-second order                              |                                 |                |
|----------------------|--------------------------------|---------------------------------|----------------|--------------------------------|----------|----------------|----------------------------|---------------------------------|----------------|--------------------------------------------------|---------------------------------|----------------|
|                      | $K_L$<br>(L mg <sup>-1</sup> ) | $q_m$ (m<br>g g <sup>-1</sup> ) | R <sup>2</sup> | $K_F$ (L<br>mg <sup>-1</sup> ) | 1/n      | R <sup>2</sup> | $K_1$ (min <sup>-1</sup> ) | $q_e$ (m<br>g g <sup>-1</sup> ) | R <sup>2</sup> | $K_2$ (g mg <sup>-1</sup><br>min <sup>-1</sup> ) | $q_e$ (m<br>g g <sup>-1</sup> ) | R <sup>2</sup> |
| 4-epi<br>TC          | 0.000803                       | 6.32                            | 0.995<br>7     | 0.0053<br>4                    | 0.9<br>9 | 0.976<br>2     | -9.36                      | 4.84                            | 0.233<br>0     | 0.00571                                          | 6.30                            | 0.940<br>3     |
| OTC                  | 0.00161                        | 3.33                            | 0.966<br>4     | 10891                          | 0.7<br>6 | 0.958<br>9     | -9.52                      | 8.12                            | 0.456<br>2     | 0.00311                                          | 9.46                            | 0.952<br>5     |
| MTC                  | 0.00165                        | 3.68                            | 0.991<br>2     | 4050                           | 1.0<br>2 | 0.968<br>2     | -9.14                      | 5.54                            | 0.246<br>7     | 0.00779                                          | 6.76                            | 0.911<br>5     |
| TC                   | 0.00442                        | 3.17                            | 0.952<br>8     | 88370                          | 0.5<br>0 | 0.961<br>1     | -9.32                      | 8.12                            | 0.337<br>6     | 0.00410                                          | 9.80                            | 0.967<br>2     |
| DC                   | 0.000954                       | 6.02                            | 0.993<br>7     | 5690                           | 0.9<br>6 | 0.975<br>0     | -9.50                      | 7.57                            | 0.420<br>8     | 0.00280                                          | 9.02                            | 0.929<br>4     |
| CTC                  | -<br>0.000174                  | -22.73                          | 0.972<br>1     | 10891                          | 0.8<br>3 | 0.949<br>0     | -9.12                      | 1.53                            | 0.165<br>4     | 0.11039                                          | 1.96                            | 0.905<br>1     |

**Table S4:** Analytical results for the determination of the six TCs residues compounds in real food samples.

| Analytes | Concentration (µg L <sup>-1</sup> ) |                 | Spiked concentration<br>(µg L <sup>-1</sup> ) | Recovery (%) |        | RSDs(%) |       |
|----------|-------------------------------------|-----------------|-----------------------------------------------|--------------|--------|---------|-------|
|          | Egg                                 | Milk            |                                               | Egg          | Milk   | Egg     | Milk  |
| 4-epi TC | NQ <sup>a</sup>                     | ND <sup>b</sup> | 100                                           | 94.99        | 88.54  | 3.23    | 5.02  |
| OTC      | NQ                                  | ND              | 100                                           | 88.93        | 96.40  | 4.21    | 1.74  |
| MTC      | ND                                  | ND              | 100                                           | 91.84        | 102.26 | 5.01    | 2.20  |
| TC       | ND                                  | ND              | 100                                           | 107.33       | 108.56 | 3.03    | 3.16  |
| DC       | ND                                  | ND              | 100                                           | 85.61        | 82.56  | 8.74    | 5.78  |
| CTC      | ND                                  | ND              | 100                                           | 93.56        | 86.34  | 10.52   | 11.82 |

<sup>a</sup>NQ: Not quantified.

<sup>b</sup>ND:

Not

detected
